# Supplementary material
Source: PubMed Central journal article supplement (PMC6885737)

# Source data for Figure 7B (1/5)

- In addition to the Western blotting replicate shown in Figure 7B, 4 additional independent experiments were performed.
  - Western blotting images from the 4 additional replicates are provided below.
  - Uncropped images are provided in the next pages
  - Mean and standard deviation of DEK and ELP3 protein quantification from all 5 replicates are provided in Figure 7B.

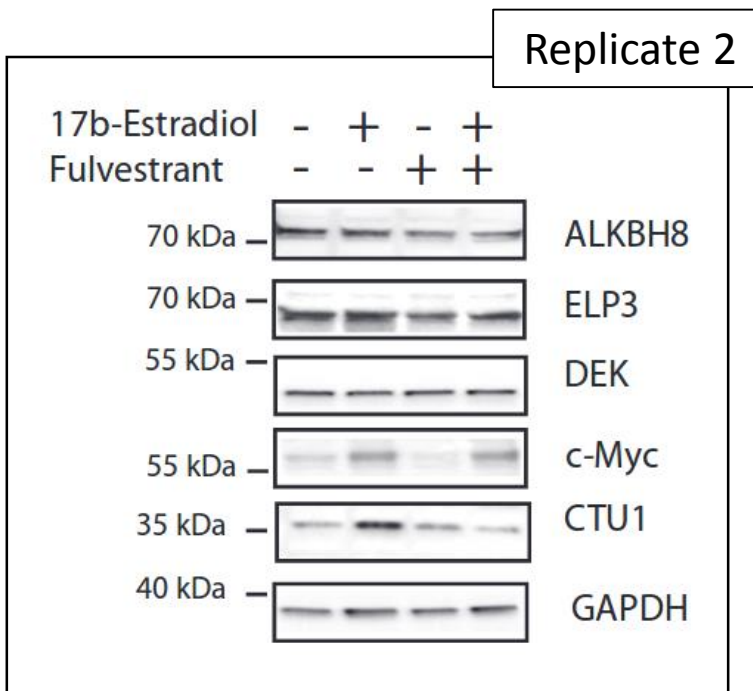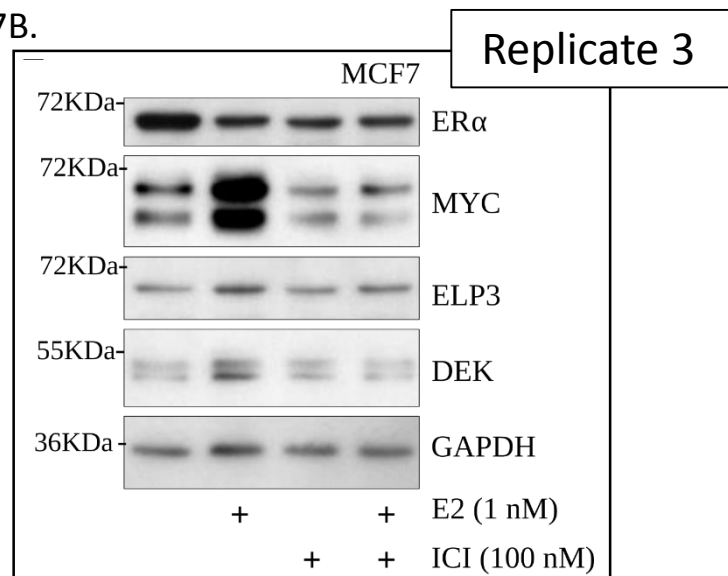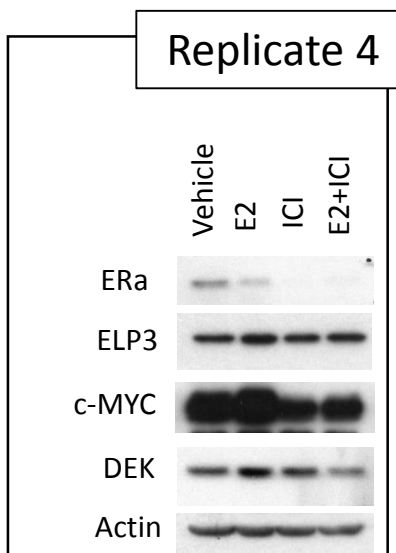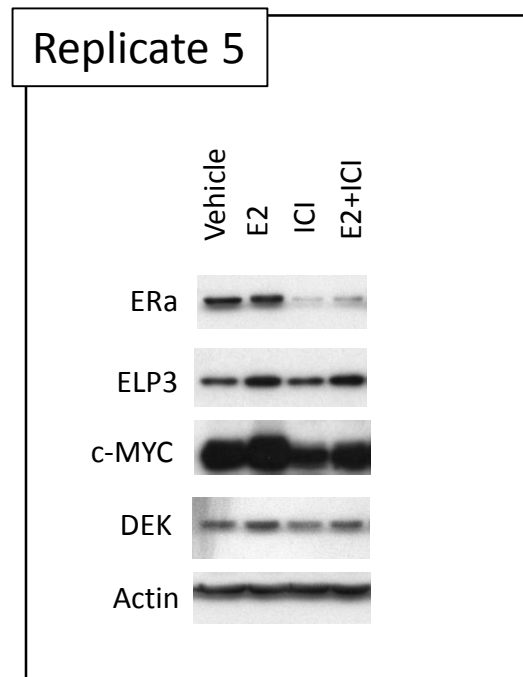

# Source data for Figure 7B (2/5)

- Uncropped images from replicate 1 (included in Fig 7B) and replicate 2

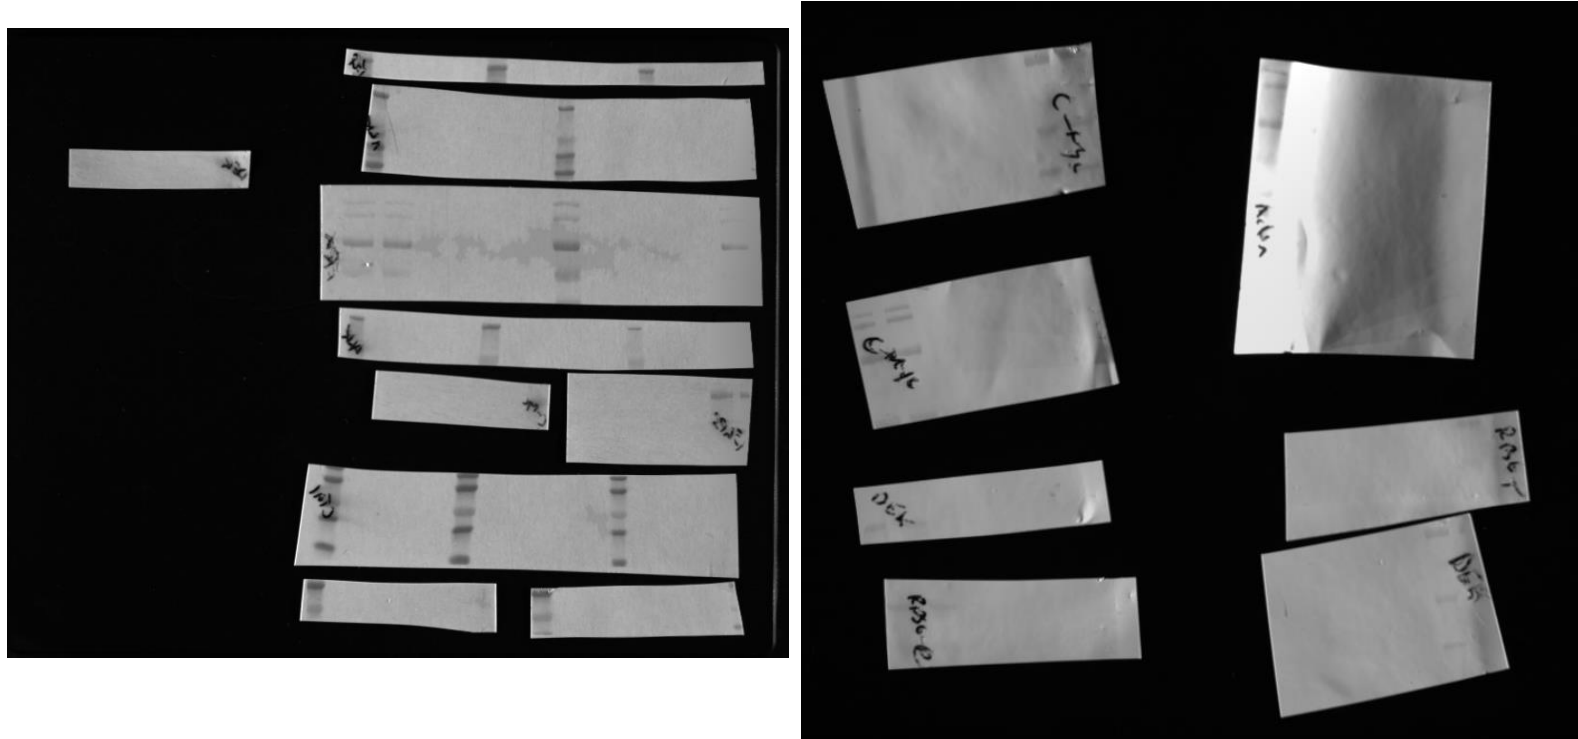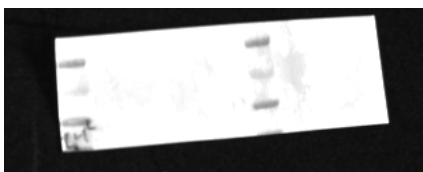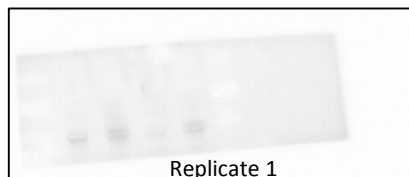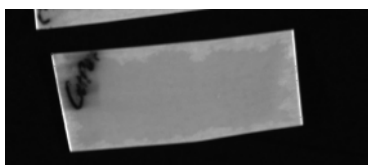

c-myc

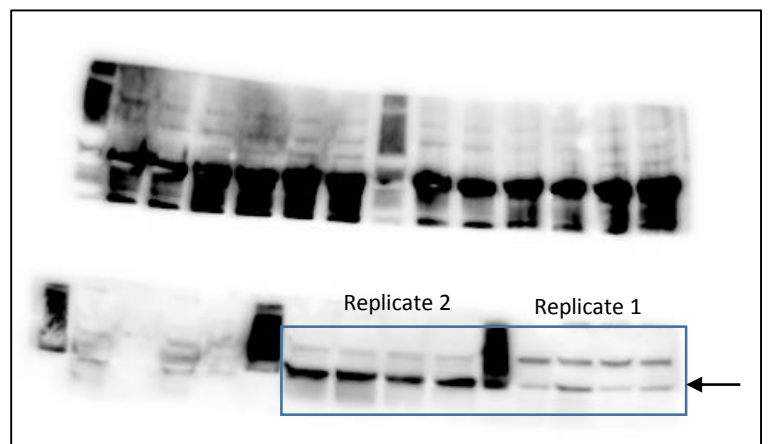

ELP3

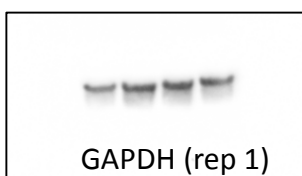

GAPDH (rep 1)

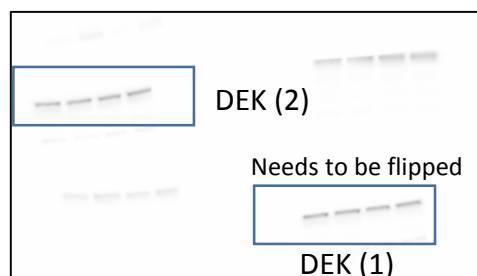

DEK (2)

Needs to be flipped

DEK (1)

Less exposed

# Source data for Figure 7B (3/5)

- Uncropped images from replicate 1 (included in Fig 7B) and replicate 2

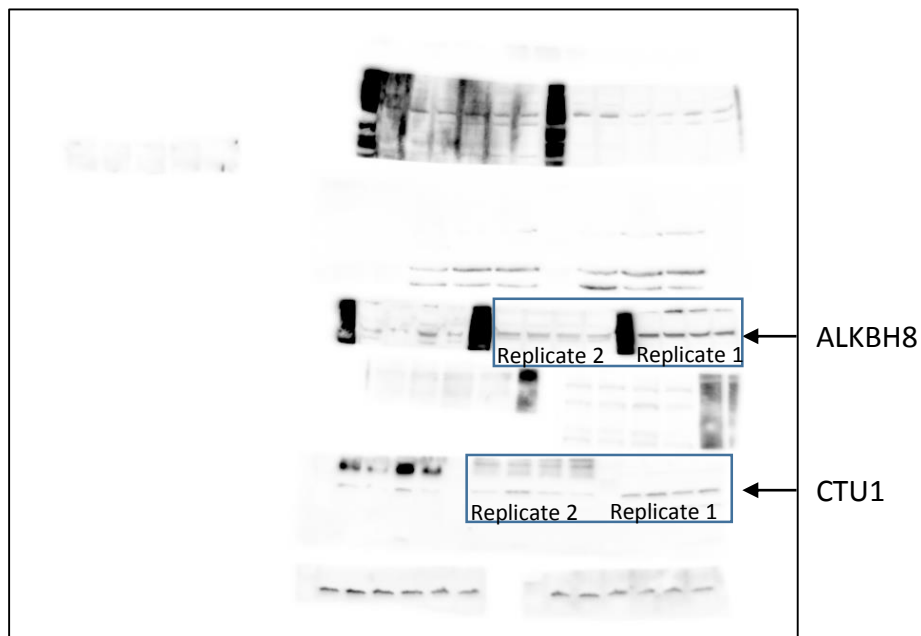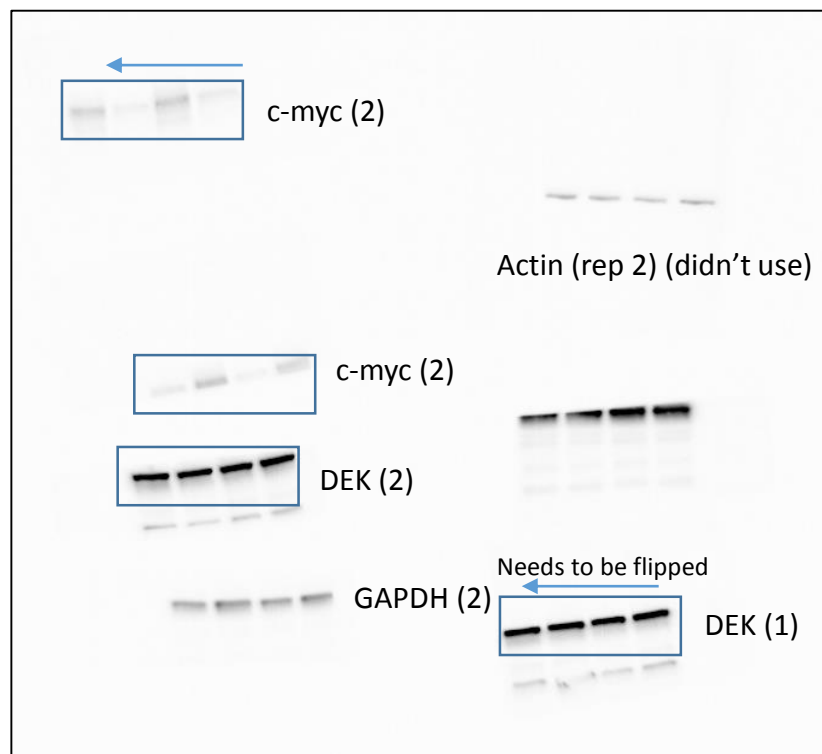

# Source data for Figure 7B (4/5)

- Uncropped images from replicate 4

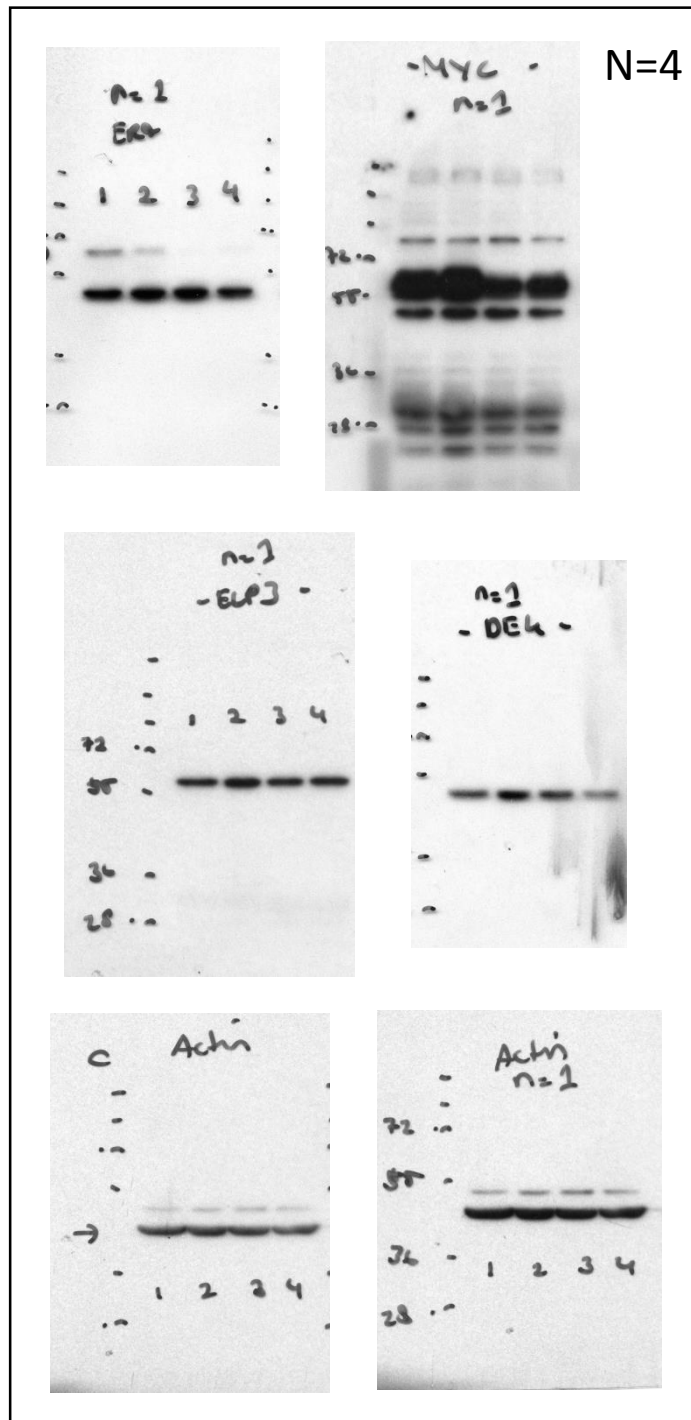

**Samples  
Left to  
right:**

- 1: Control
- 2: E2
- 3: ICI
- 4: Both

# Source data for Figure 7B (5/5)

- Uncropped images from replicate 5

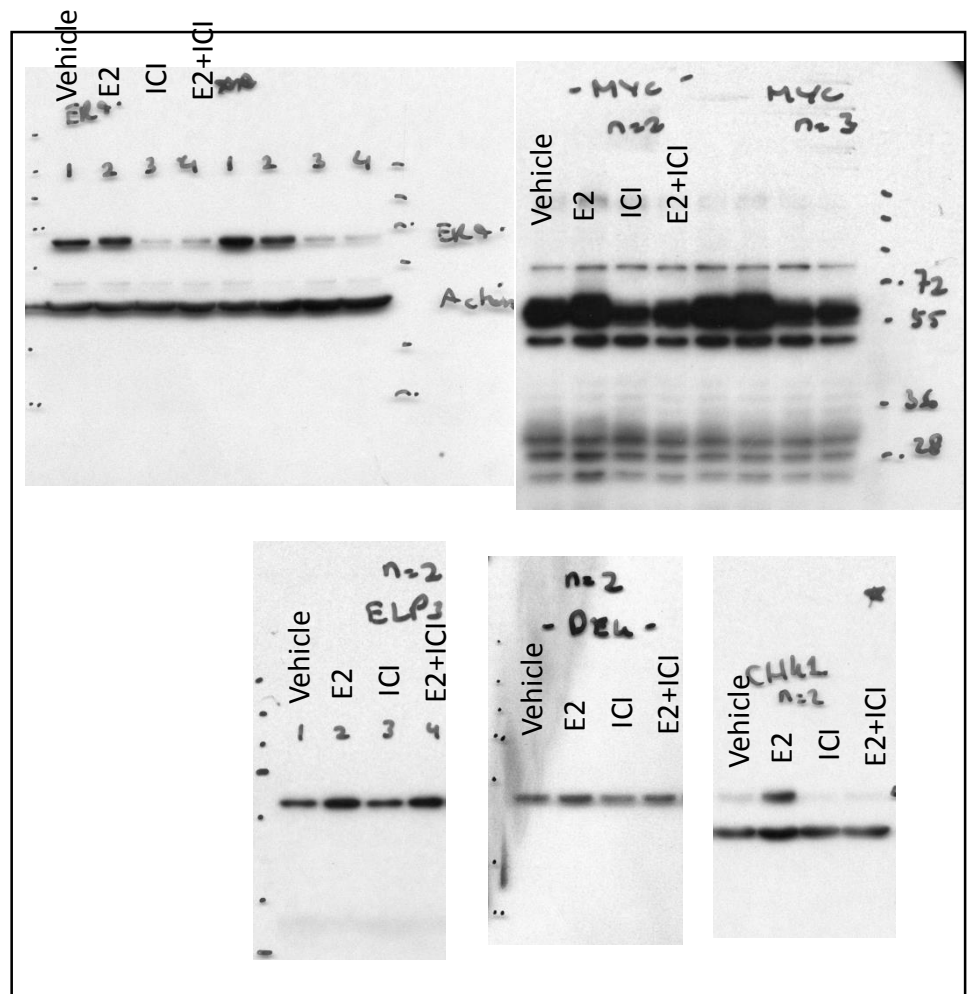

# Source data for Figure 7D (1/2)

- In addition to the Western blotting replicate shown in Figure 7D, 1 additional independent experiments was performed.
  - Western blotting images from the additional replicate is provided below.
  - Uncropped images of both replicates are provided below and in the next page

## Replicate 2

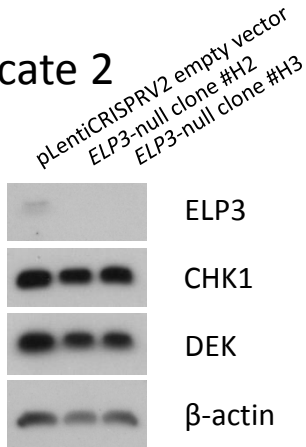

- Uncropped images from replicate 1 (included in Figure 7D)

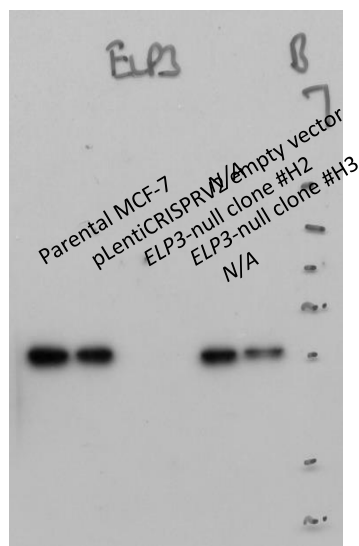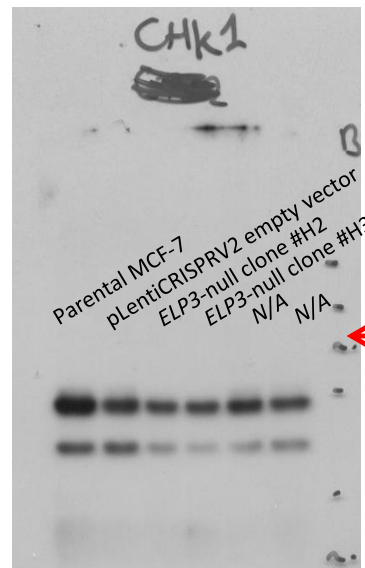

CHK1

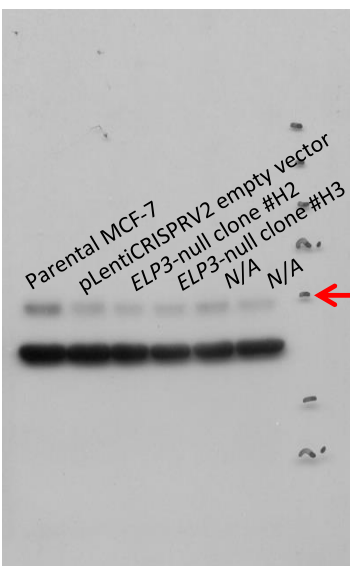

Actin

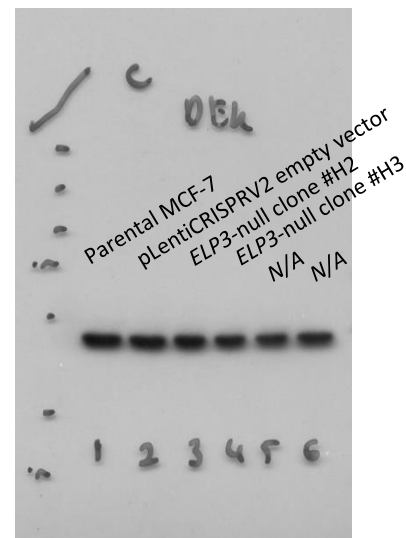

DEK

# Source data for Figure 7D (2/2)

- Uncropped images from replicate 2

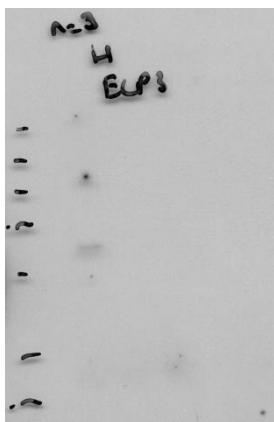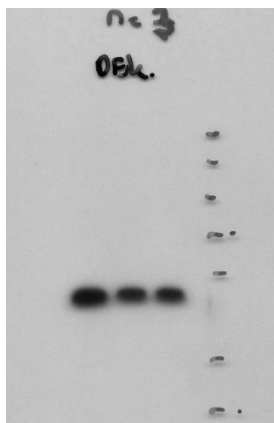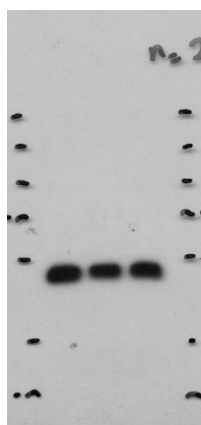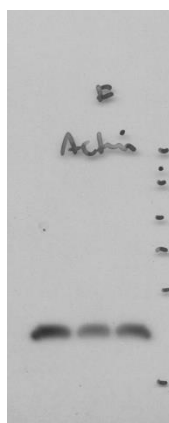

Supplement: EMBJ-38-e101323-s010.pdf [file EMBJ-38-e101323-s010.pdf]
