# Supplementary material
Source: PubMed Central journal article supplement (PMC6885737)
Supplement: EMBJ-38-e101323-s008.pdf [file EMBJ-38-e101323-s008.pdf]

# Source data for Figure 2B (1/7)

- Immunoblotting was performed on 6 independent replicates of BM67 shER $\alpha$  and shCtrl cells extracts

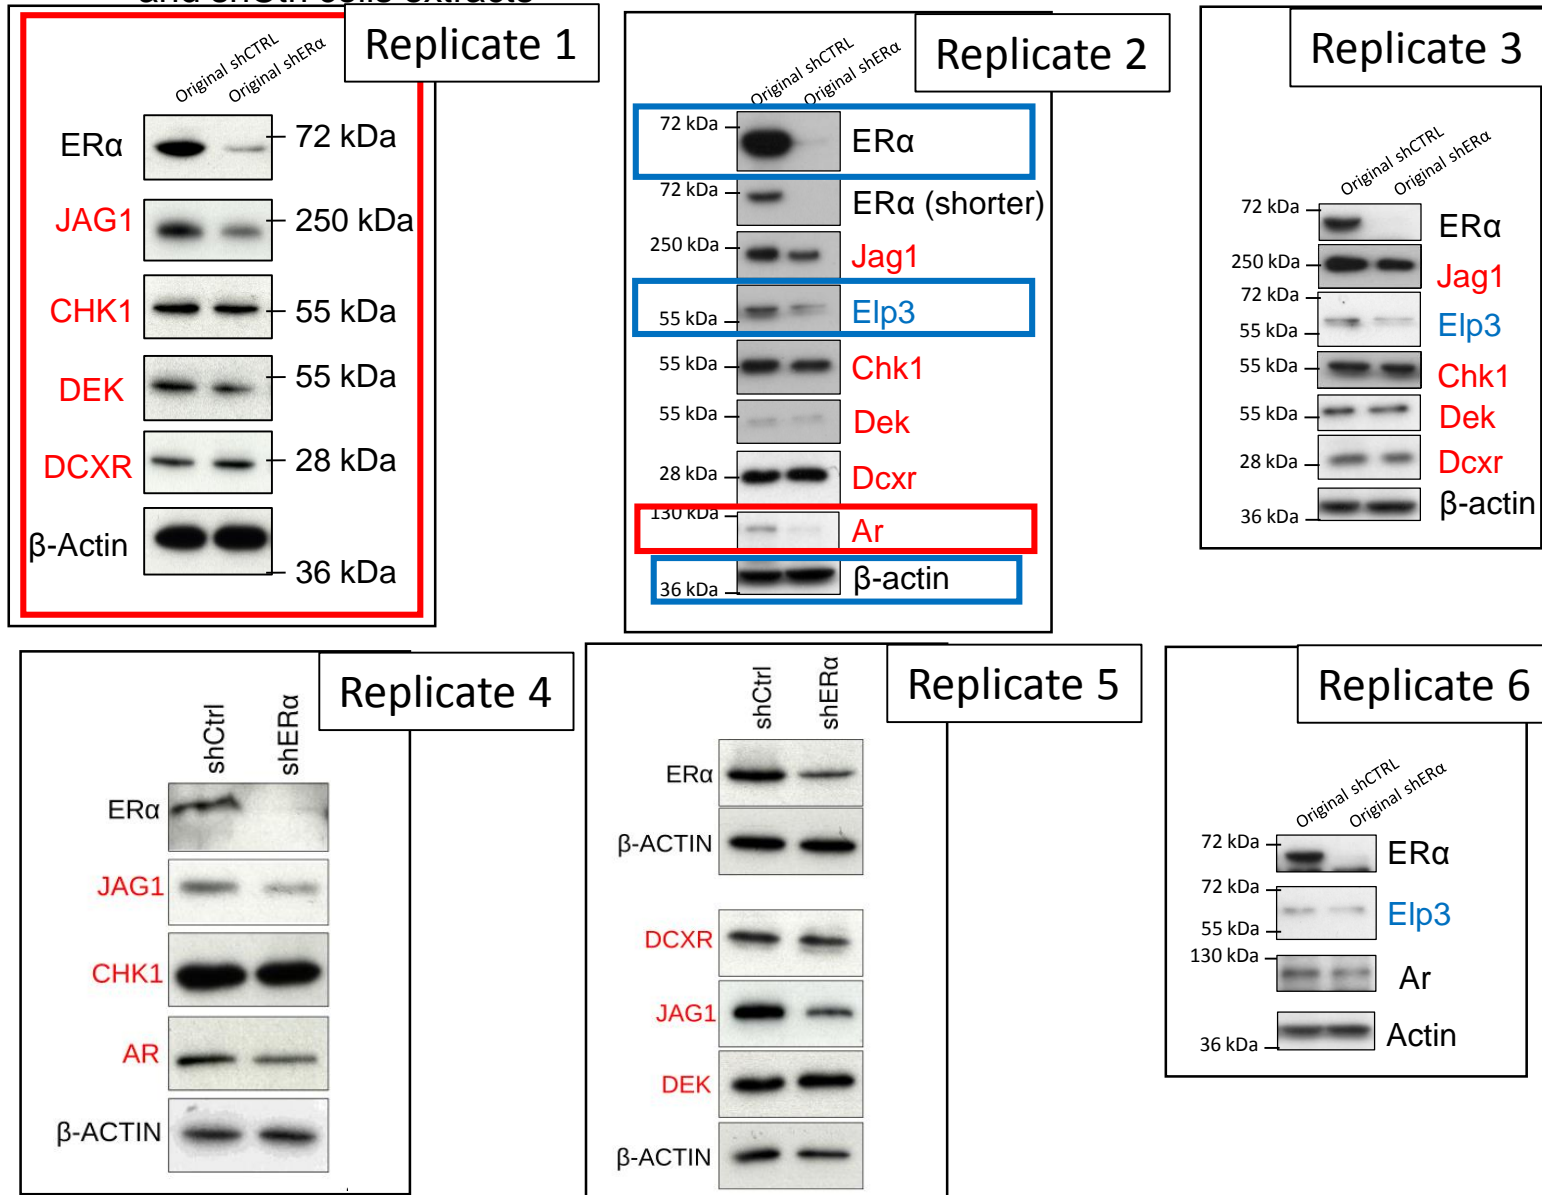

- Immunoblotting for ER $\alpha$ , JAG1, CHK1, DEK, DCXR and  $\beta$ -ACTIN from replicate 1 as well as for AR and  $\beta$ -actin from replicate 2 were included in main Figure 2B (red squares)
- The quantification and statistics presented in Figure 2B (right panel) include (protein names colored in red):
  - AR: n = 3 (replicates 2, 4 and 6)
  - DEK: n = 4 (replicates 1, 2, 3 and 5)
  - CHK1: n = 4 (replicates 1, 2, 3 and 4)
  - DCXR: n = 4 (replicates 1, 2, 3 and 5)
  - JAG1: n = 5 (replicates 1, 2, 3, 4 and 5)
- ELP3 measurements were performed on some of these replicates (2, 3, and 6) and are included in Figure 6A (see source data for Figure 6A)

# Source data for Figure 2B (2/7)

- Uncropped gels – replicate 1

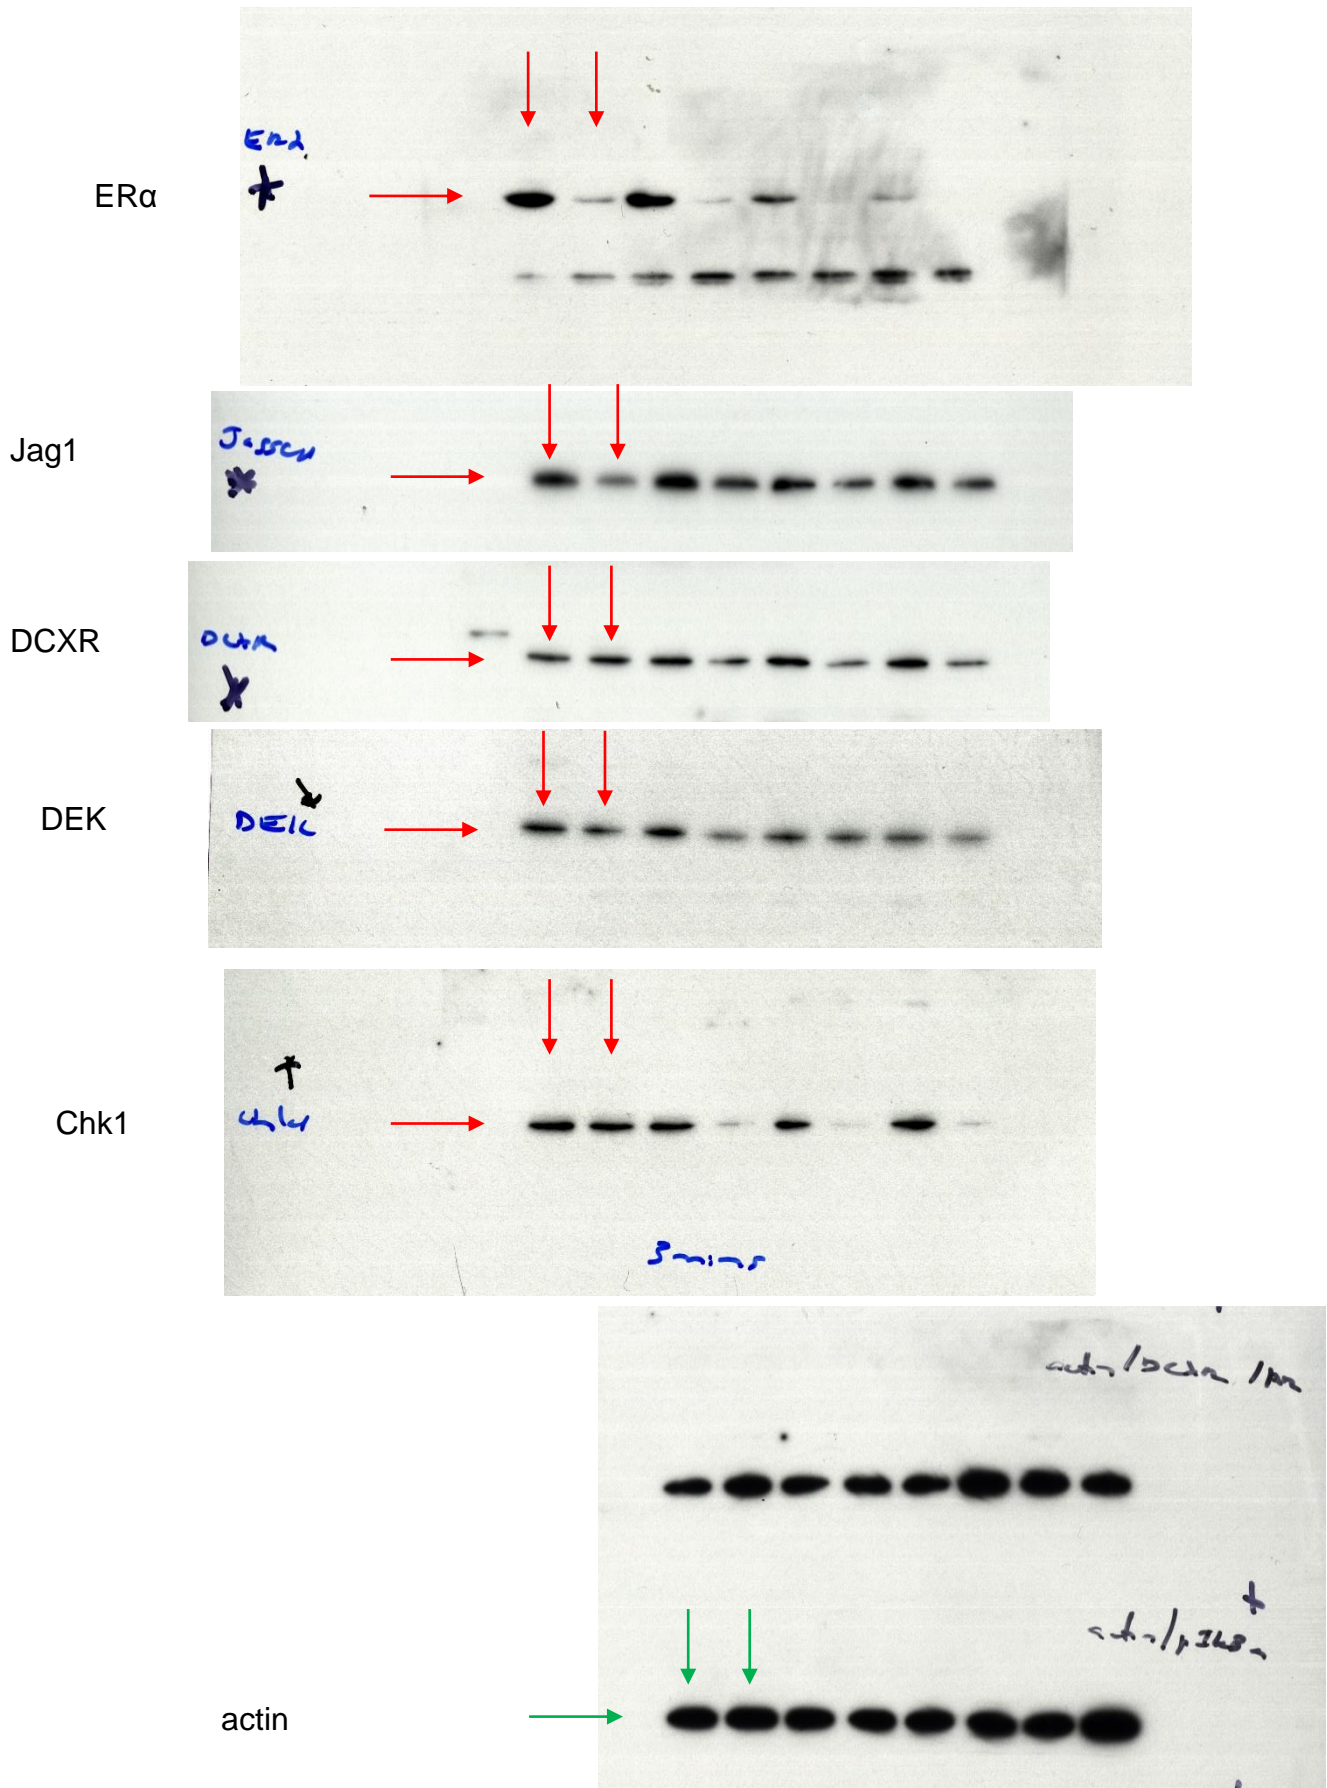

# Source data for Figure 2B (3/7)

- Uncropped gels – replicate 2

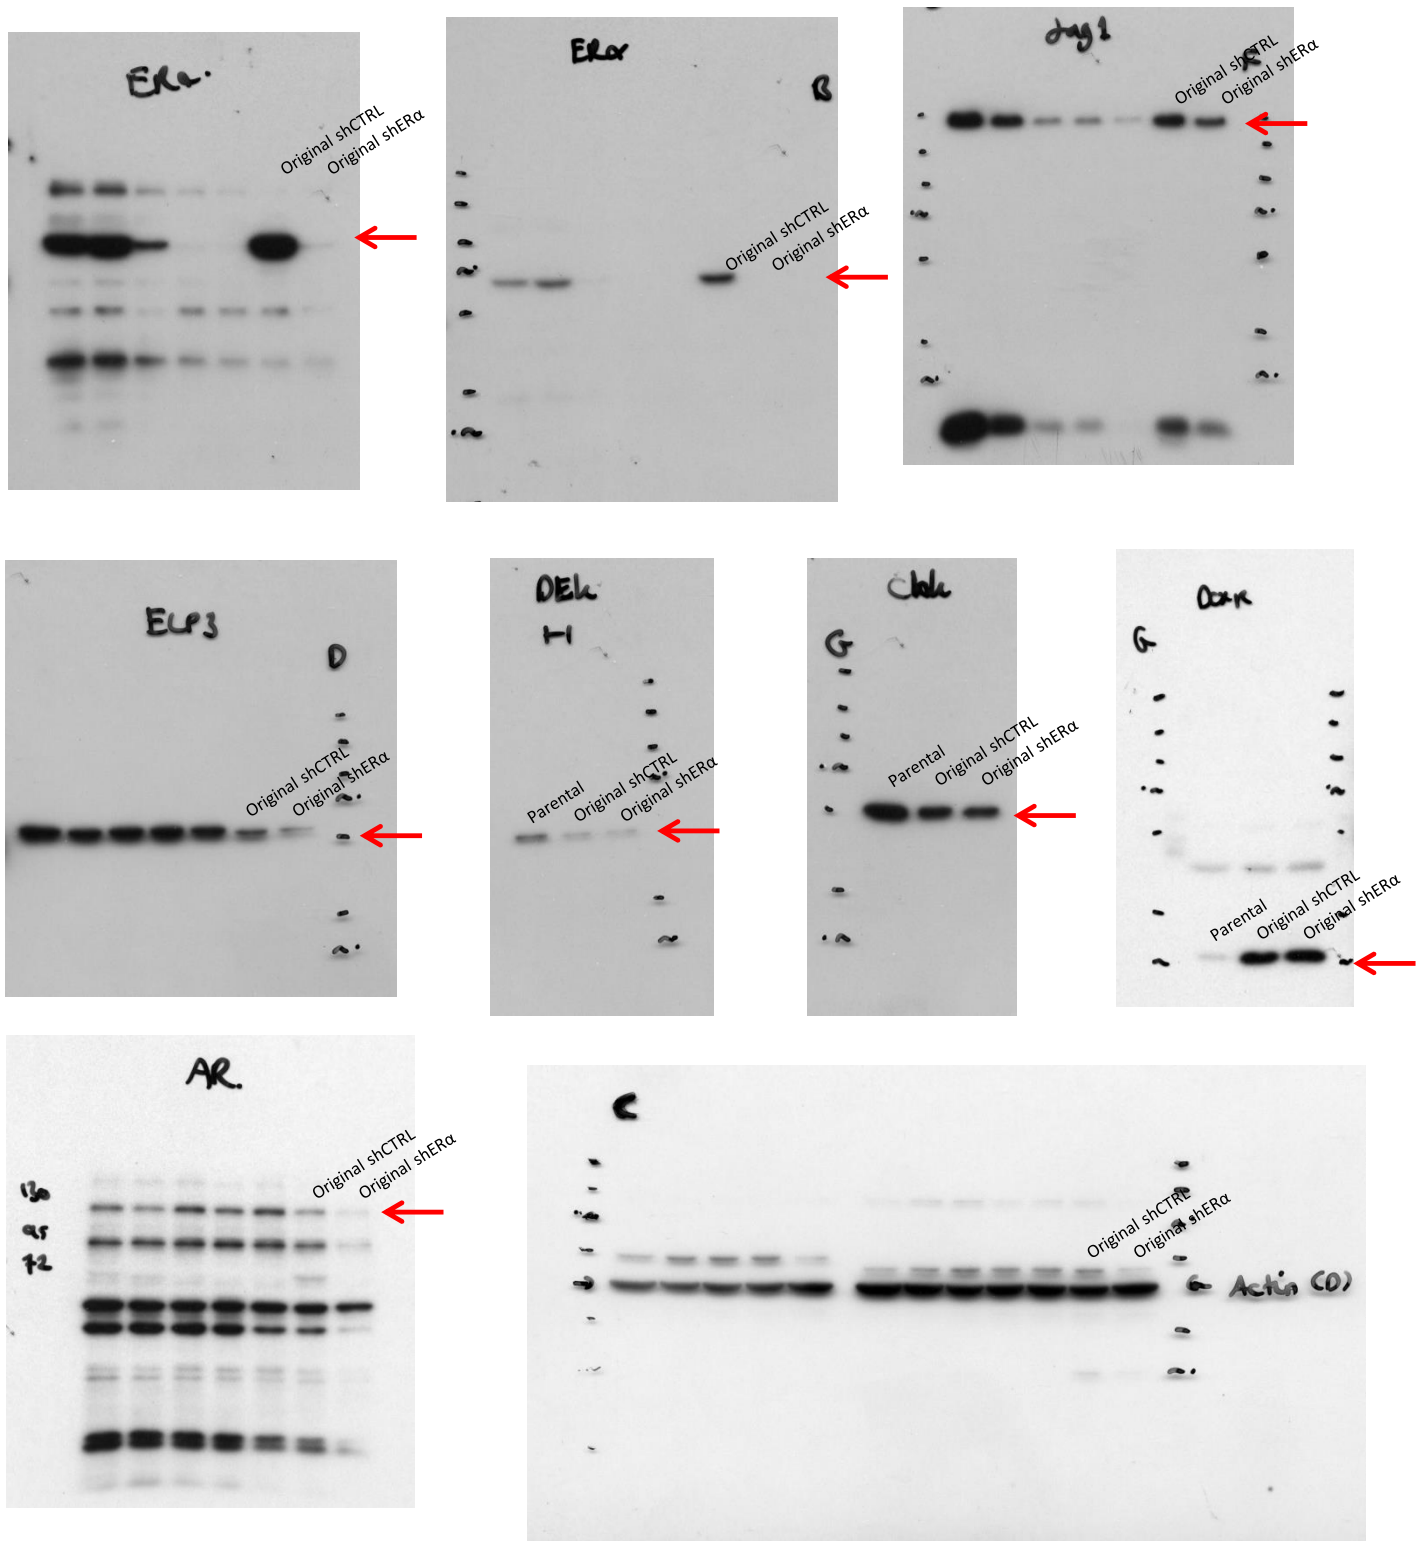

# Source data for Figure 2B (4/7)

- Uncropped gels – replicate 3

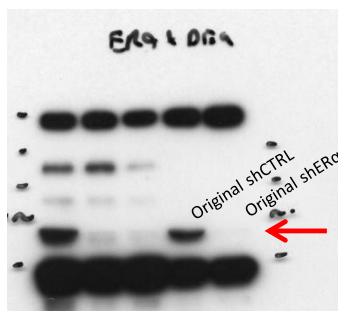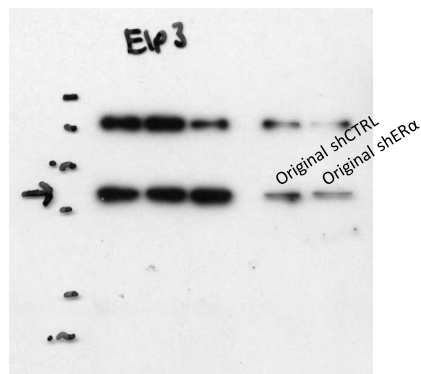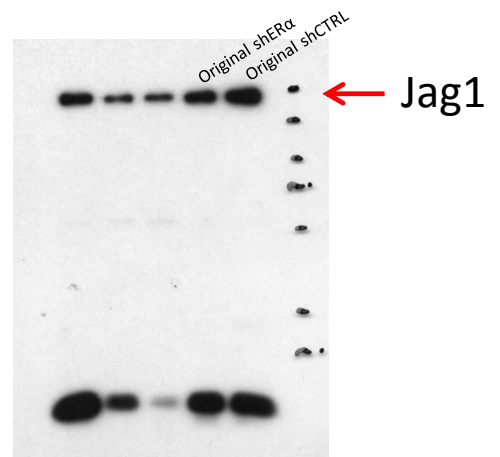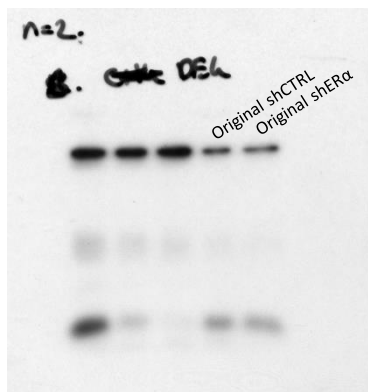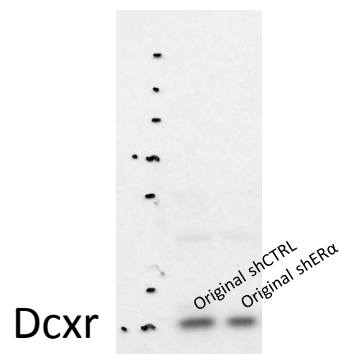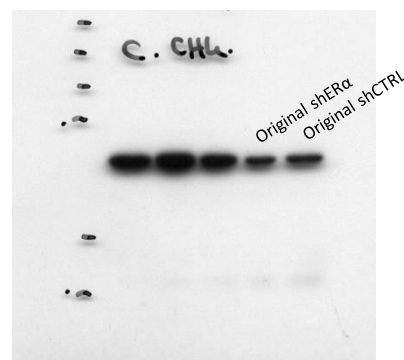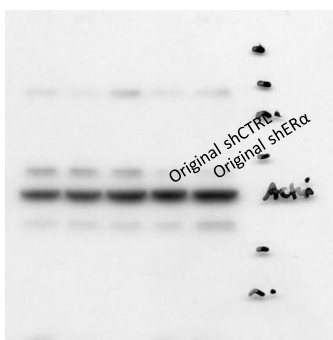

# Source data for Figure 2B (5/7)

- Uncropped gels – replicate 4

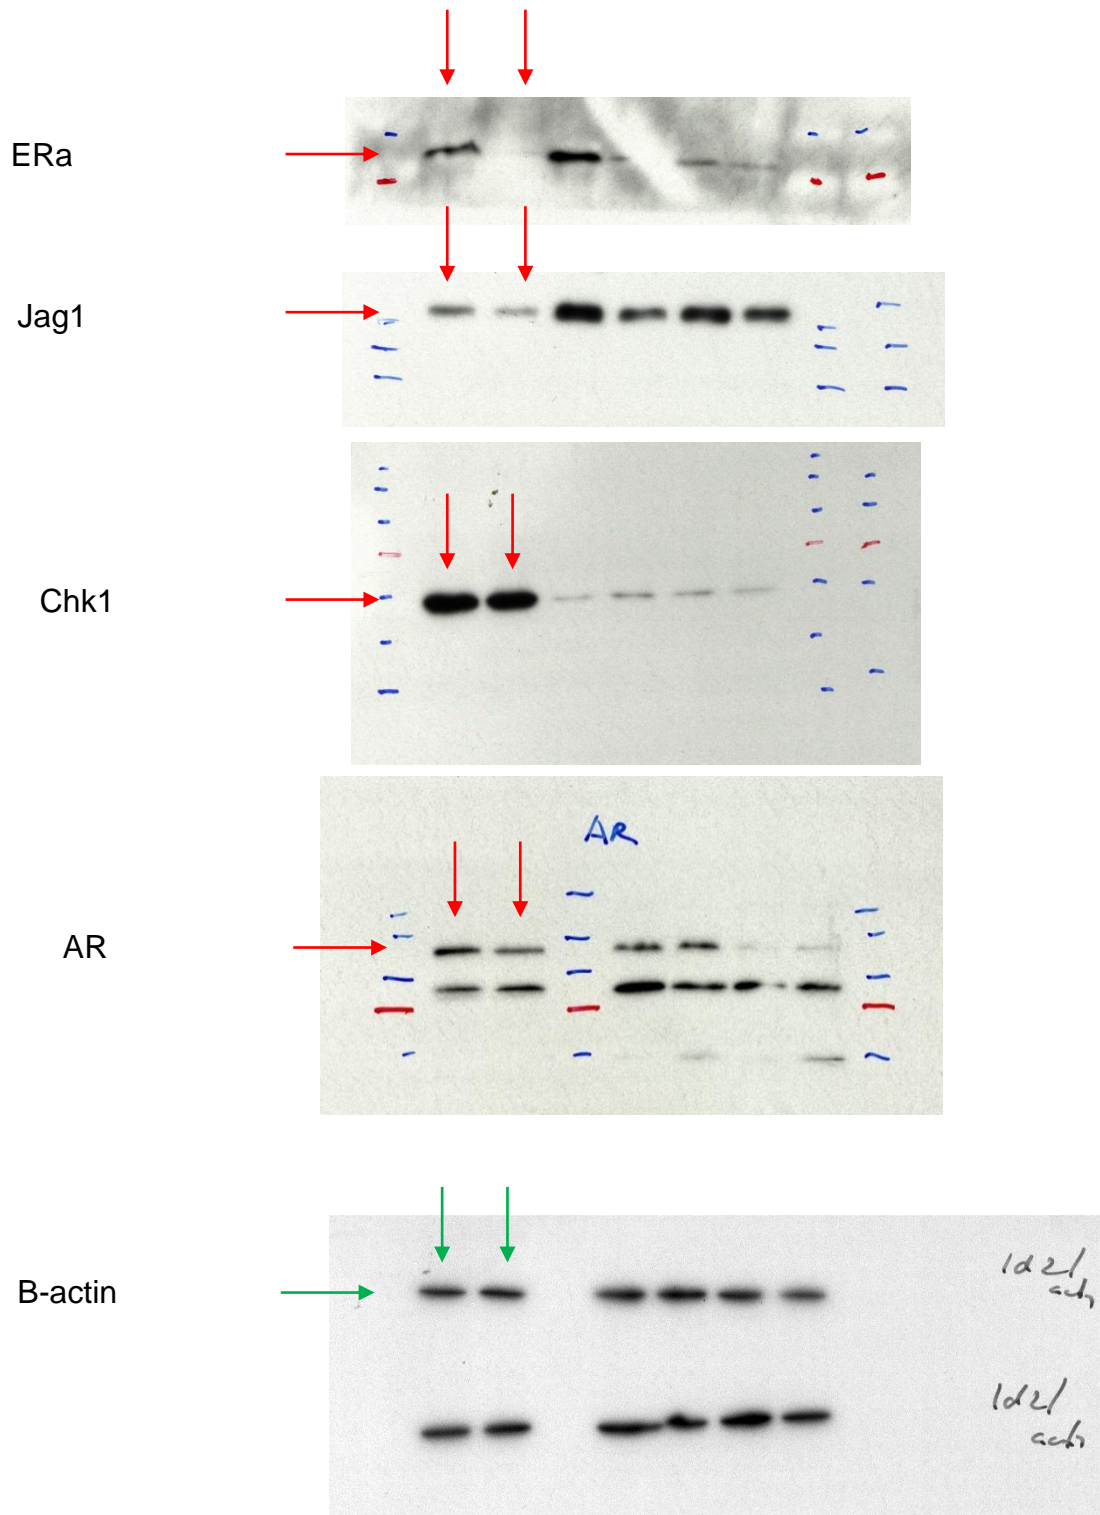

# Source data for Figure 2B (6/7)

- Uncropped gels – replicate 5

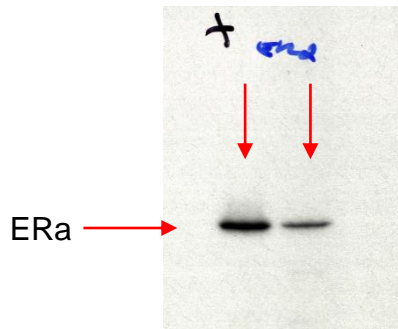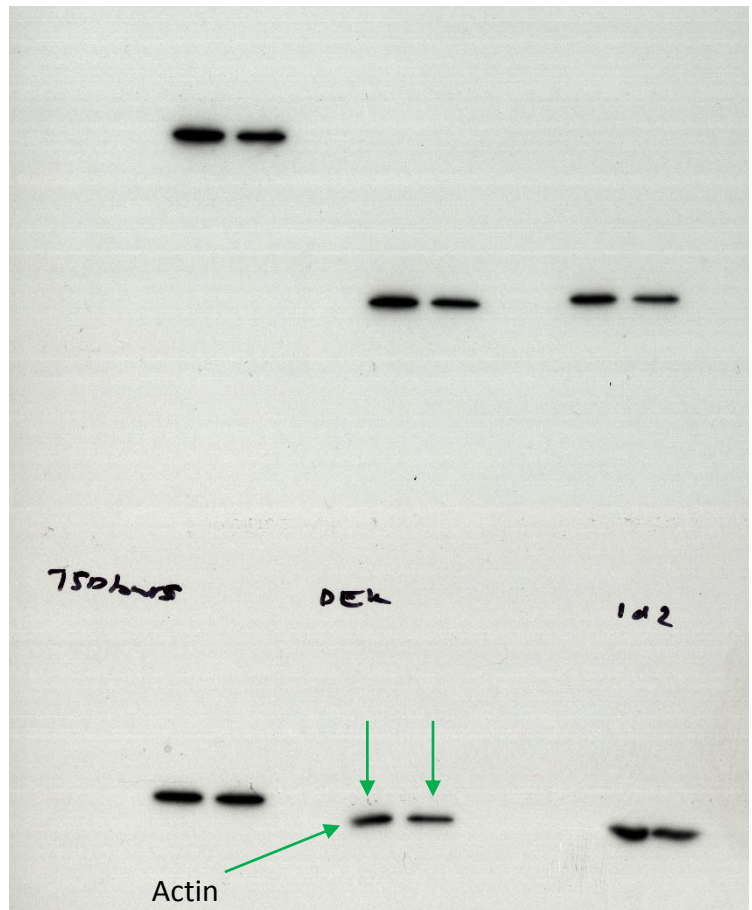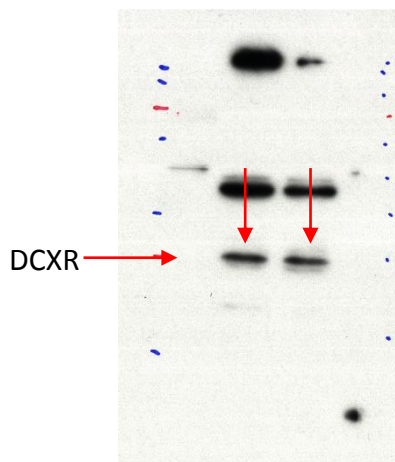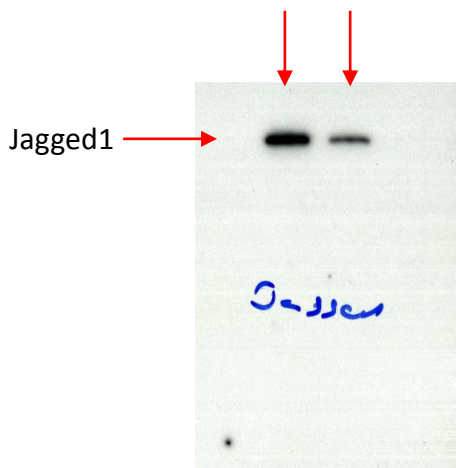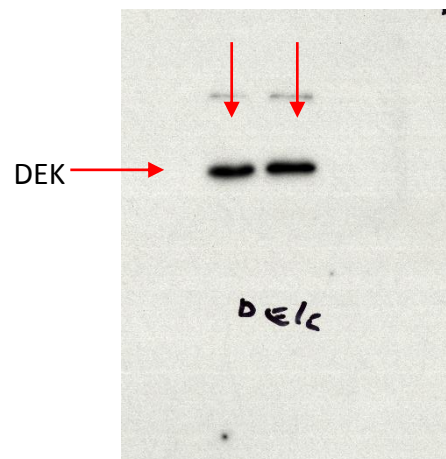

# Source data for Figure 2B (7/7)

- Uncropped gels – replicate 6

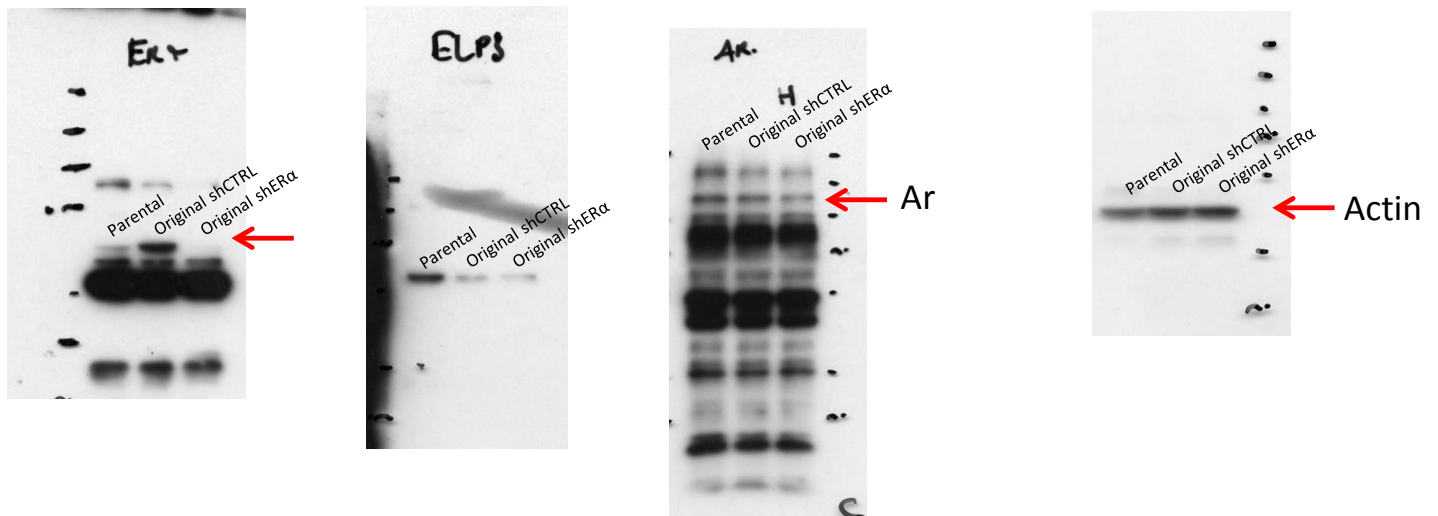

# Source data for Figure 2C (1/6)

- 5 independent experiments were performed in BM67 shER $\alpha$  and shCtrl cells. Replicate 1 is shown in Figure 2C. Replicates 2, 3, 4 and 5 are shown below
- Uncropped gels for all replicates are shown in the next pages

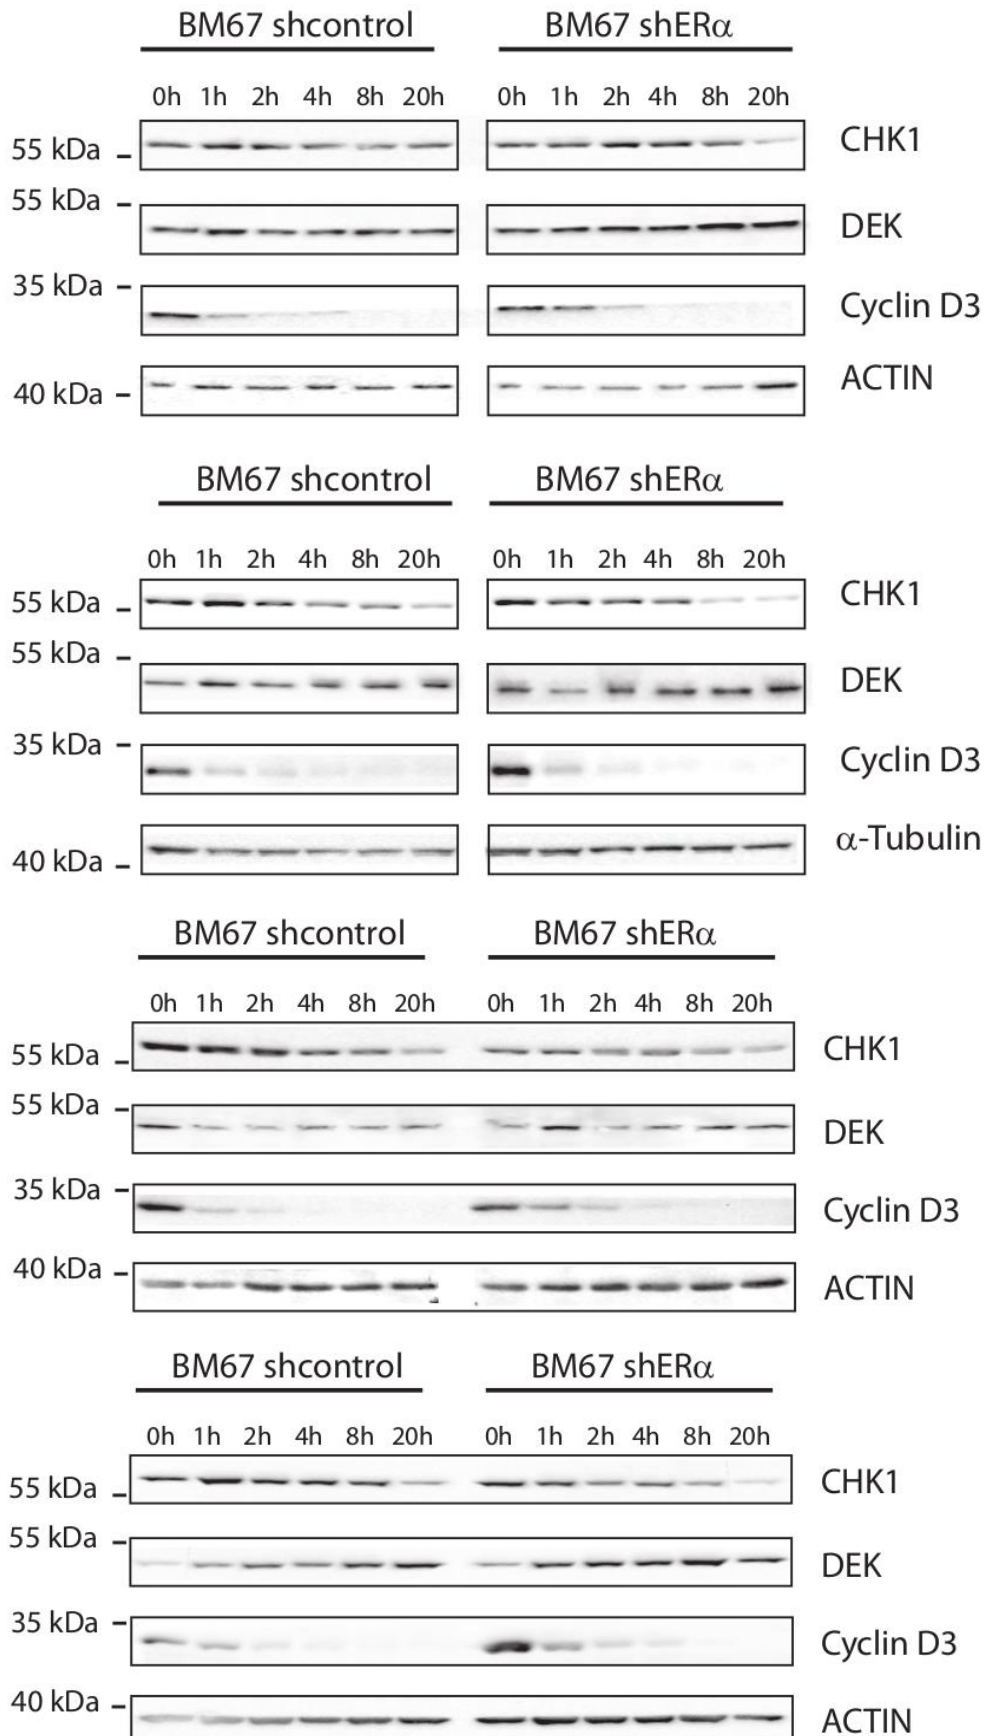



# Source data for Figure 2C (2/6)

- Uncropped gels for replicates 1 and 2

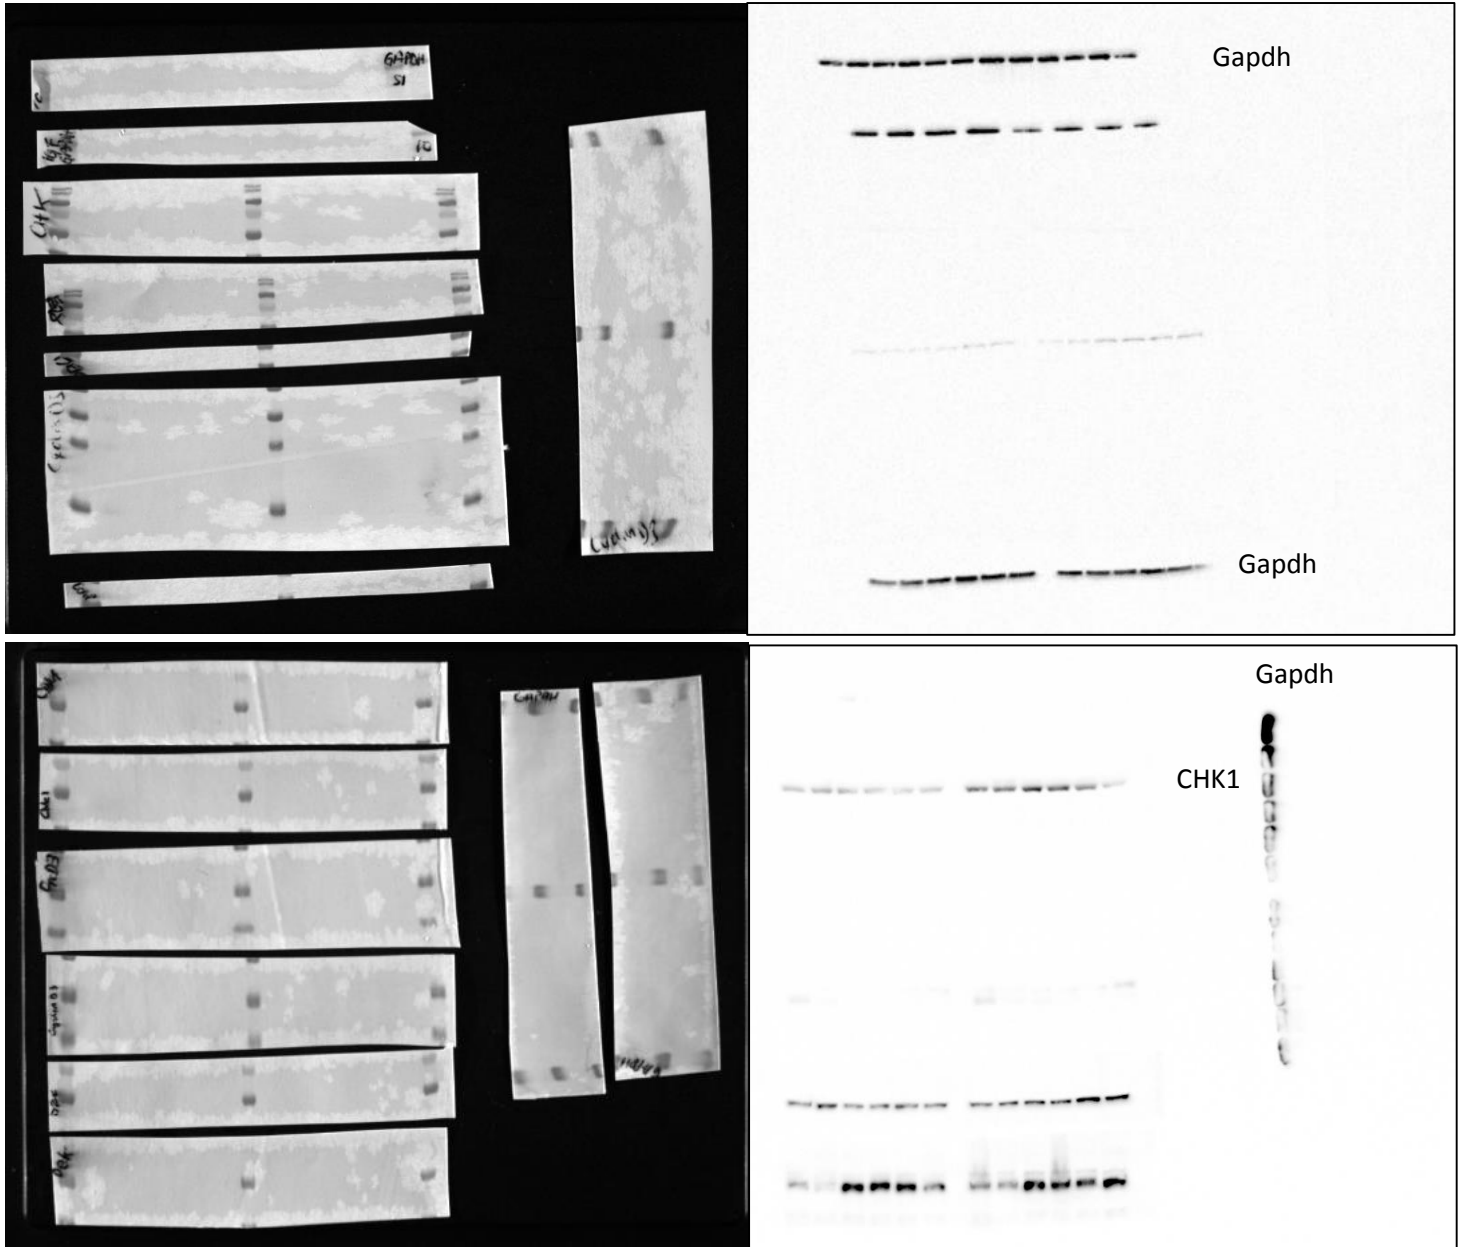

# Source data for Figure 2C (3/6)

- Uncropped gels for replicates 1 and 2

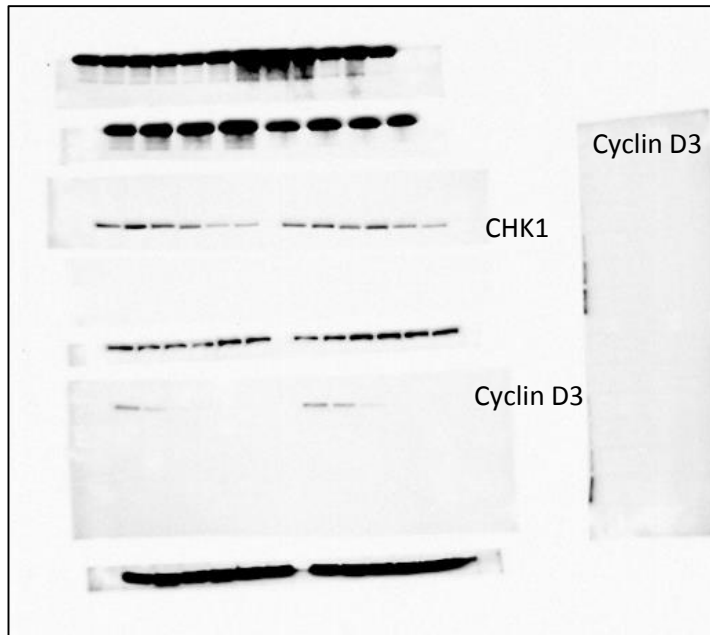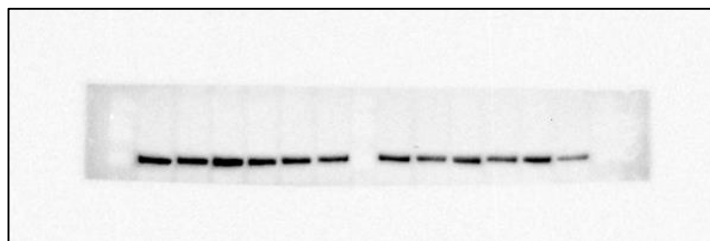

tubulin

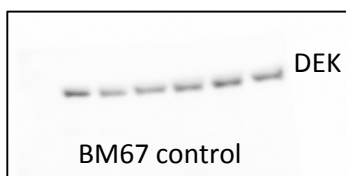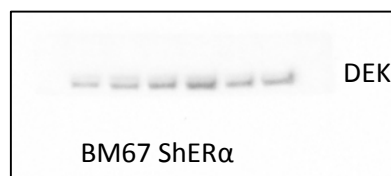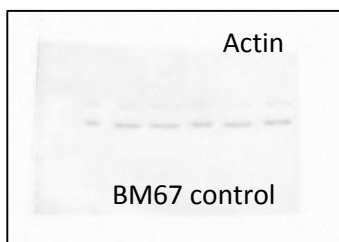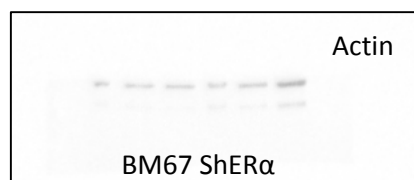

1<sup>st</sup> and 2<sup>nd</sup> replicate

# Source data for Figure 2C (4/6)

- Uncropped gels for replicate 3

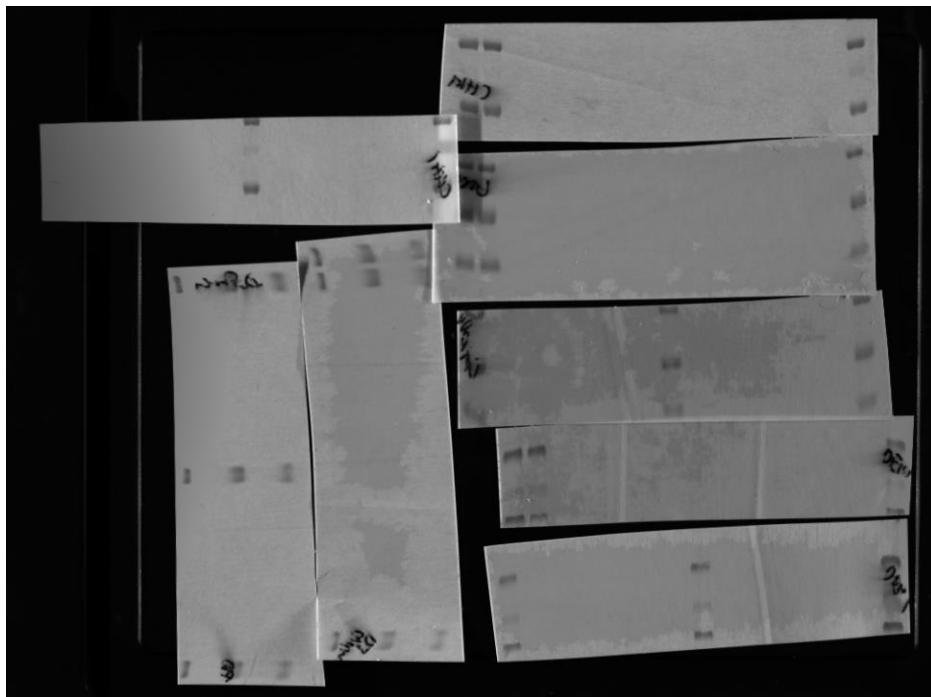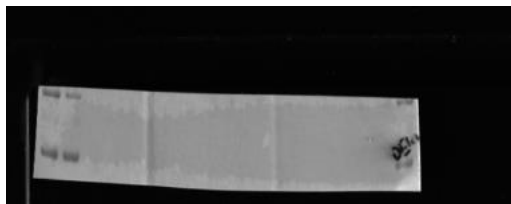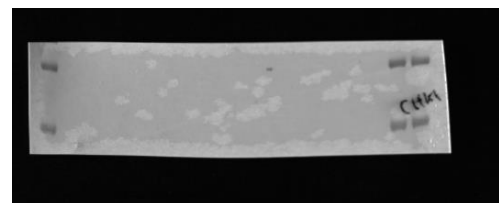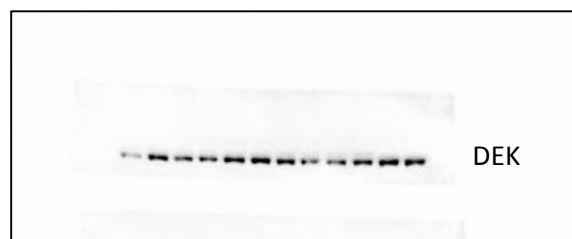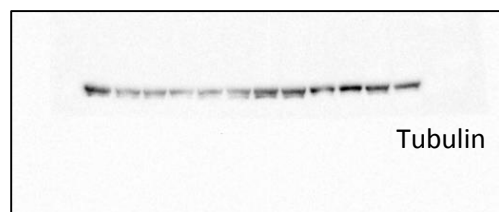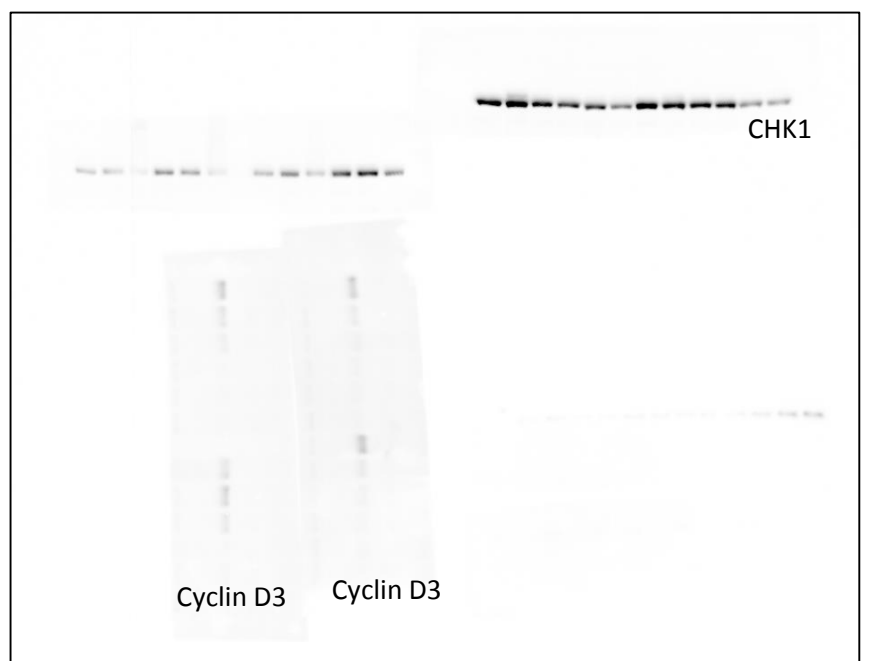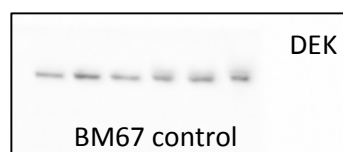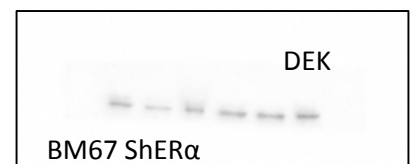

3<sup>rd</sup> replicate

# Source data for Figure 2C (5/6)

- Uncropped gels for replicate 4

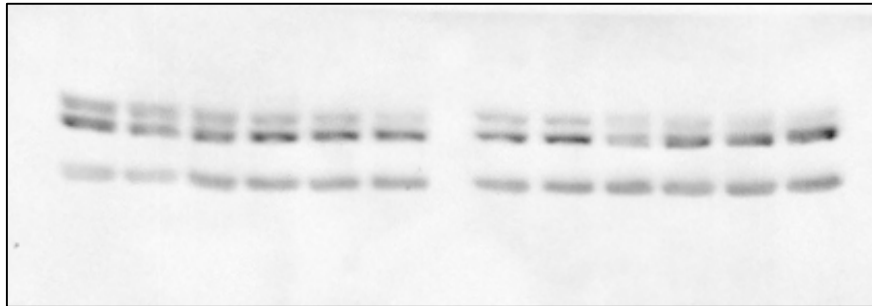

Actin

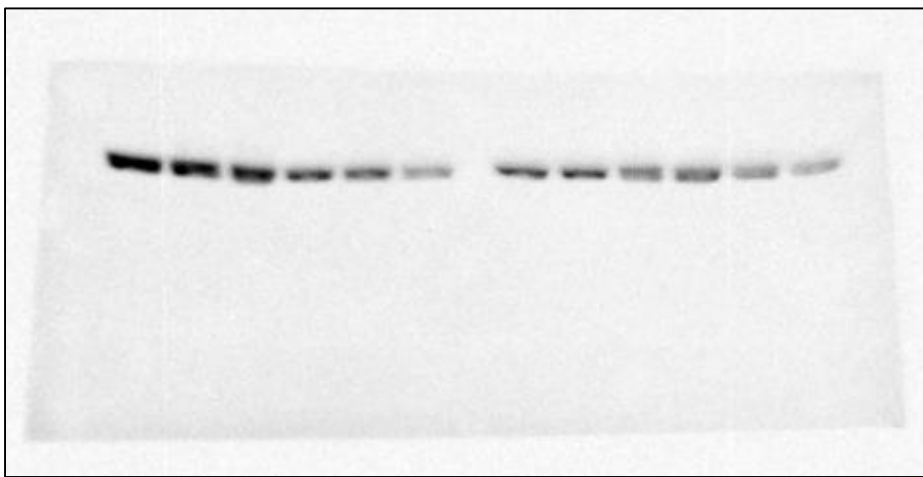

CHK1

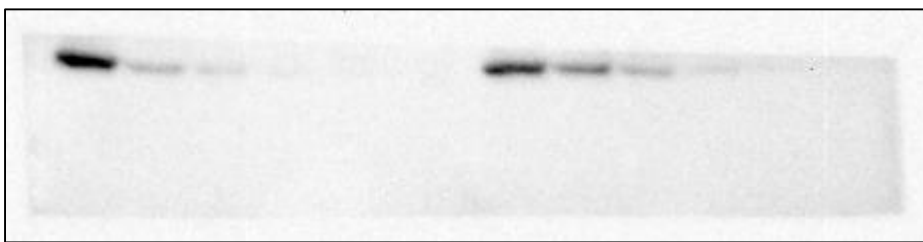

Cyclin D3

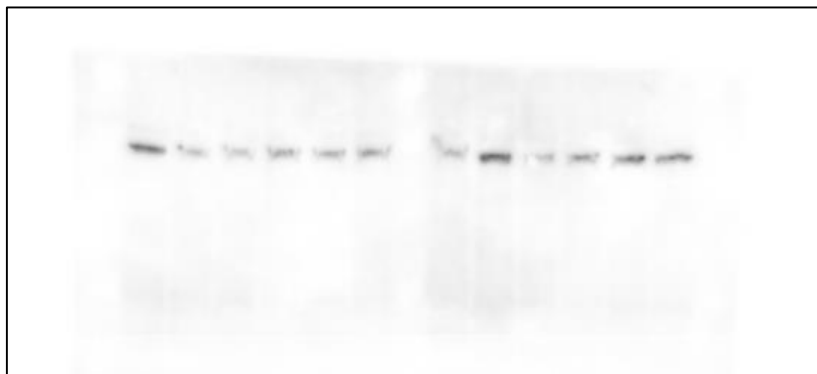

DEK

4th replicate

# Source data for Figure 2C (6/6)

- Uncropped gels for replicate 5

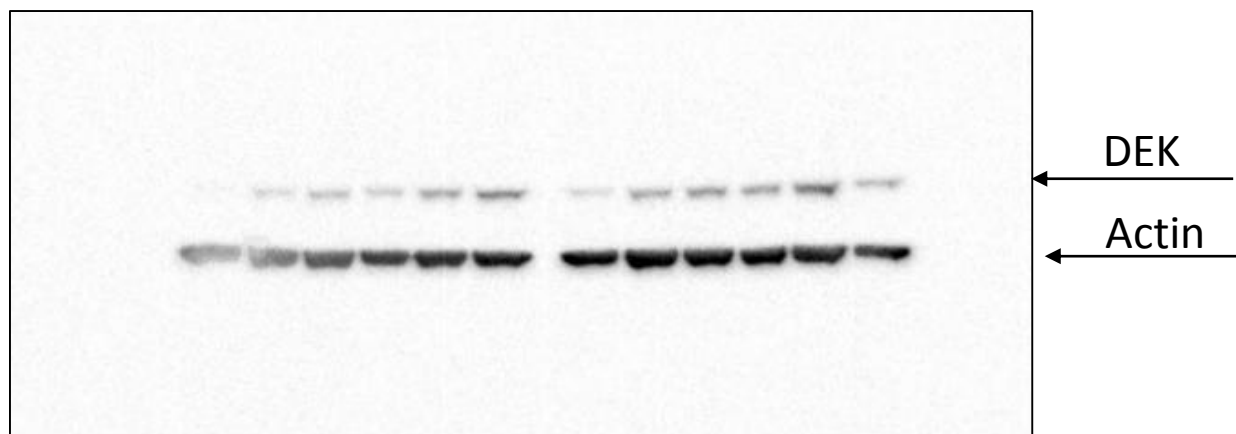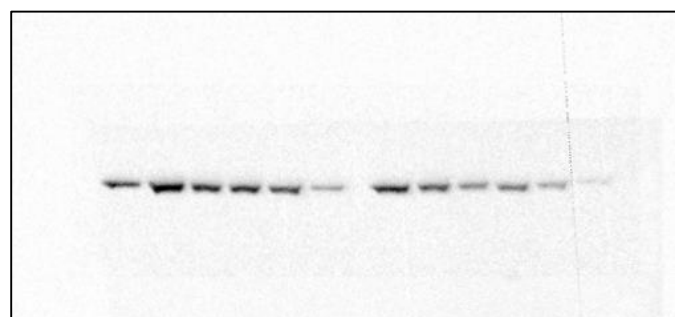

CHK1

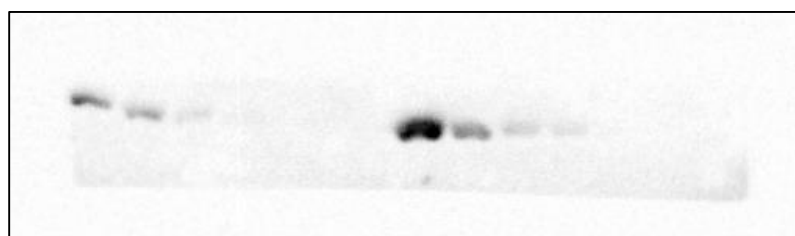

Cyclin D3

5th replicate
