# Supplementary material
Source: PubMed Central journal article supplement (PMC6885737)

# Source data for Figure 1A

- Uncropped gels

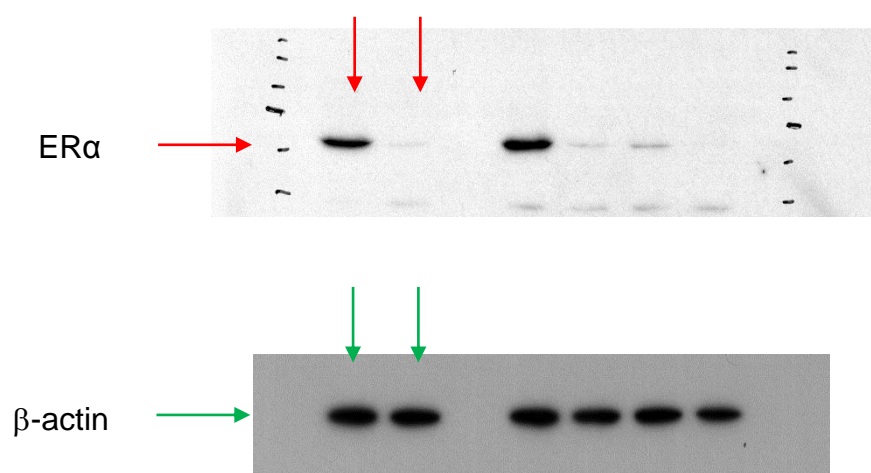

Supplement: EMBJ-38-e101323-s007.pdf [file EMBJ-38-e101323-s007.pdf]
